# Supplementary material for: Graphene ink for 3D extrusion micro printing of chemo-resistive sensing devices for volatile organic compound detection
Source: Royal Society of Chemistry journal article supplement (doi:10.1039/d1nr00150g), 2021-01-01
Supplement: d1nr00150g1.pdf [file d1nr00150g1.pdf]

## Supplementary Information

### Graphene ink for 3D extrusion micro printing of chemo-resistive sensing devices for volatile organic compounds detection

Kamrul Hassan,<sup>a,b</sup> Tran Thanh Tung,<sup>a,b</sup> Nathan Stanley,<sup>a,b</sup> Pei Lay Yap,<sup>a,b</sup> Farzaneh

Farivar,<sup>a,b</sup> Hadi Rastin,<sup>a,b</sup> Md Julker Nine<sup>a,b</sup> and Dusan Losic<sup>a,b\*</sup>

<sup>a</sup>*School of Chemical Engineering and Advanced Materials, The University of Adelaide, Adelaide, SA 5005, Australia*

<sup>b</sup>*ARC Research Hub for Graphene Enabled Industry Transformation, The University of Adelaide, Adelaide, SA 5005, Australia*

#### Contact angle measurement:

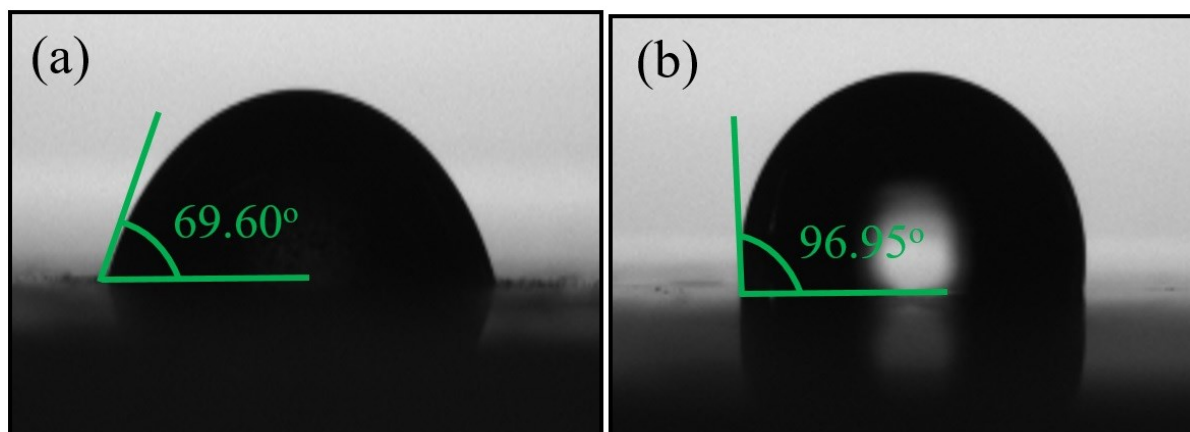

Fig. S1. Contact angle measurement of printed graphene ink (c) before annealing, and (d) after annealing at 250 °C temperature.

Table S1. Contact angles and calculated surface energy of printed graphene ink (a) before annealing and (b) after annealing at 250 °C temperature.

| Sample                             | Contact angle (°) | Owens–Wendt method <sup>25</sup> |                       |                       | Wu method <sup>26</sup> |                       |                       |
|------------------------------------|-------------------|----------------------------------|-----------------------|-----------------------|-------------------------|-----------------------|-----------------------|
|                                    |                   | $\gamma_{sv}(mN/m)$              | $\gamma_{sv}^D(mN/m)$ | $\gamma_{sv}^p(mN/m)$ | $\gamma_{sv}(mN/m)$     | $\gamma_{sv}^D(mN/m)$ | $\gamma_{sv}^p(mN/m)$ |
| Graphene ink<br>(before annealing) | 69.60             | 97.45                            | 43.58                 | 54.27                 | 108.69                  | 56.83                 | 51.84                 |
| Graphene ink<br>(after annealing)  | 96.95             | 96.95                            | 0.005                 | 0.005                 | -3.8                    | -0.98                 | -2.05                 |

Table S2. Surface area and surface volume calculation for 3D printed sensor and conventional sensor.

| <b><i>For 3D printed sensor:</i></b>                                                                                                                                                                                                                                                                                                                                        | <b><i>For conventional sensor (non-printed):</i></b>                                                                                                                                                                                                                                                                                                              |
|-----------------------------------------------------------------------------------------------------------------------------------------------------------------------------------------------------------------------------------------------------------------------------------------------------------------------------------------------------------------------------|-------------------------------------------------------------------------------------------------------------------------------------------------------------------------------------------------------------------------------------------------------------------------------------------------------------------------------------------------------------------|
| <p>No of printed line=13,</p> <p>Length (L) =6.60 mm,</p> <p>width (d) = 0.6 mm,</p> <p>average thickness (<math>T_{avg}</math>) = 15 <math>\mu m</math> = 0.015 mm</p> <p>Active area <math>_{eff}</math> (<math>A_{printed\ sensor}</math>)<br/> <math>= N \times (L \times d)</math><br/> <math>= 13 \times (6.60 \times 0.6)</math><br/> <math>= 51.48\ mm^2</math></p> | <p>No of spherical curve (drop cast) = 1,</p> <p>radius (r) =2.5 mm,</p> <p>average thickness (<math>T_{avg}</math>) = 145 <math>\mu m</math> = 0.145 mm</p> <p>Active area <math>_{eff}</math> (<math>A_{printed\ sensor}</math>)<br/> <math>= N \times \pi r^2</math><br/> <math>= 1 \times (3.1415 \times (2.5)^2)</math><br/> <math>= 19.625\ mm^2</math></p> |
| <p>Active volume <math>_{eff} = Active\ area\ _{eff} \times T_{Avg}</math><br/> <math>= 51.48 \times 0.015</math><br/> <math>= 0.7722\ m^3</math></p>                                                                                                                                                                                                                       | <p>Active volume <math>_{eff} = Active\ area\ _{eff} \times T_{Avg}</math><br/> <math>= 19.625 \times 0.145</math><br/> <math>= 2.845\ m^3</math></p>                                                                                                                                                                                                             |
| <p>SA:V = Active area <math>_{eff}</math> / Active volume <math>_{eff}</math><br/> <math>= 51.48 / 0.7722 = \mathbf{66.66}</math></p>                                                                                                                                                                                                                                       | <p>SA:V = Active area <math>_{eff}</math> / Active volume <math>_{eff} =</math><br/> <math>19.625 / 2.845 = \mathbf{6.91}</math></p>                                                                                                                                                                                                                              |

### Humidity effect:

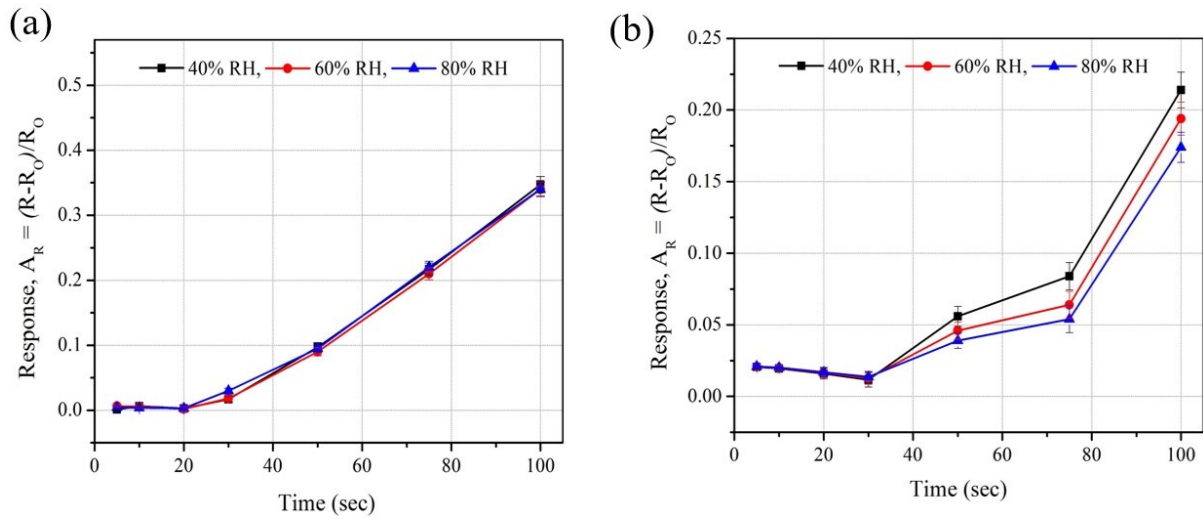

Fig. S2. Transient response of printed sensors to (a) methanol and (b) acetone vapour under different humidity at room temperature (20 °C).

### Sensor stability and durability:

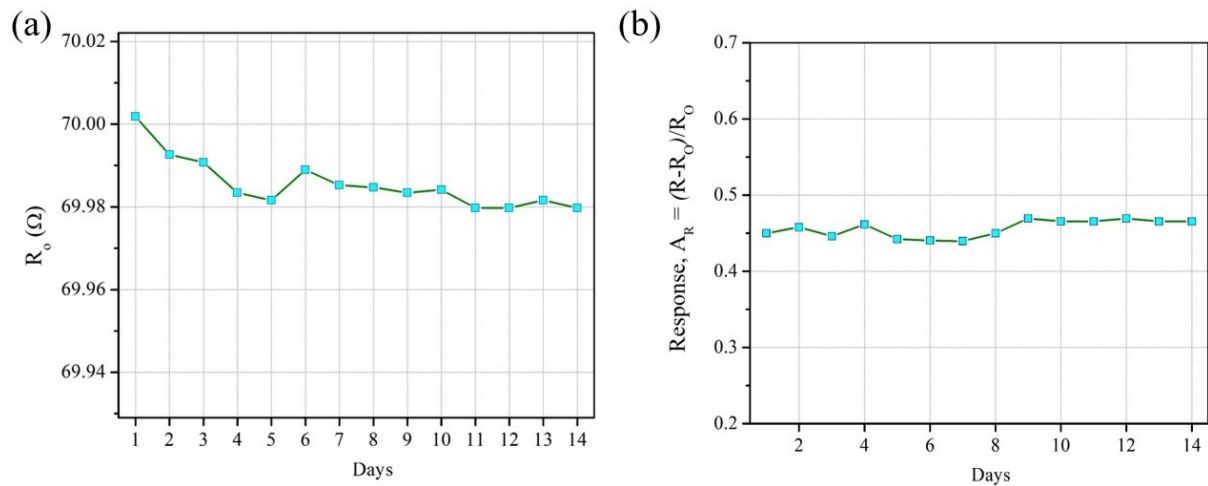

Fig. S3. Time reliance of the printed sensor (c) baseline resistance value and (d) response value, monitored over a fourteen-day period, where on each day the printed sensor was exposed to saturated ethanol biomarkers at room temperature (20 °C).
